# Supplementary material for: Improvement of hydrogen production from Chlorella sp. biomass by acid-thermal pretreatment
Source: PeerJ. 2019 Mar 21;7:e6637. doi: 10.7717/peerj.6637 (PMC6431539; doi:10.7717/peerj.6637)
Supplement: Data S1 [file peerj-07-6637-s001.xlsx]

## Sheet: Acid pretreatment
Effect of acids
	Reducing sugars (mg/g)		Inhibitors (mg/g)		Efficiency (RS/Inhibitor)
	Average	SD	Average	SD	Average	SD
H3PO4	0	0.0394	2.4178	0.0165	0	0
HCl	4.6636	0.1043	4.609	0.1171	1.0118	0.0483
H2SO4	5.9714	0.314	3.0719	0.0272	1.9439	0.1194
HNO3	3.915	0.0394	3.4107	0.0244	1.1479	0.0198
Control	2.0995	0.3723	2.1583	0.0062422	0.9727	0.1753
Effect of acid concentration (% v/v)
	Reducing sugars (mg/g)		Inhibitors (mg/g)		Efficiency (RS/Inhibitor)
	Average	SD	Average	SD	Average	SD
Control	1.9925	0.1222	2.282	0.0056267	0.8731	0.0557
0.5	2.4923	0.0831	2.4676	0.0082577	1.01	0.0371
1	3.156	0.0538	2.5784	0.0082577	1.224	0.0248
2	4.8969	0.3586	2.709	0.0334	1.8076	0.1546
3	5.9311	0.3063	3.0109	0.075	1.9699	0.1508
4	8.1805	0.1662	3.4569	0.0595	2.3664	0.0888
5	8.9733	0.176	3.7254	0.1444	2.4087	0.1406
6	9.0643	0.3521	3.7531	0.0466	2.4152	0.1238
7	9.5285	0.1042	4.1585	0.1394	2.2913	0.1019
8	10.1648	0.2014	4.4144	0.0731	2.3026	0.0838
9	10.4141	0.2841	4.9081	0.1485	2.1218	0.1221
10	10.6978	0.234	5.1838	0.1316	2.0637	0.0975
Effect of biomass concentration (g/L)
	Reducing sugars (mg/g)		Inhibitors (mg/g)		Efficiency (RS/Inhibitor)
	Average	SD	Average	SD	Average	SD
10	4.2651	0.1616	3.2963	0.0353	1.2939	0.0629
20	5.562	0.1692	3.3512	0.1547	1.6597	0.1271
30	7.09	0.3033	3.6354	0.0557	1.9503	0.1133
40	7.3429	0.2135	3.582	0.0731	2.0499	0.1015
50	6.9303	0.1946	3.237	0.0437	2.141	0.089
Effect of pretreatment time (min)
	Reducing sugars (mg/g)		Inhibitors (mg/g)		Efficiency (RS/Inhibitor)
	Average	SD	Average	SD	Average	SD
Control	1.8407	0.1454	2.1123	0.0237	0.8714	0
0	1.8232	0.1438	2.3453	0.0293	0.7774	0.071
15	3.7124	0.4443	2.9099	0.0798	1.2758	0.1877
30	7.0206	0.1925	3.2029	0.0323	2.1919	0.0822
45	7.3723	0.1695	3.2518	0.0888	2.2672	0.114
60	8.0044	0.1357	3.2322	0.0909	2.4764	0.1116
90	8.6312	0.0452	3.3748	0.0563	2.5575	0.0561
120	9.6672	0.084	3.6425	0.0358	2.654	0.0491
150	10.1808	0.0399	3.6601	0.0529	2.7816	0.0511
180	10.3462	0.0657	3.6425	0.0498	2.8404	0.0569

## Sheet: Acid-thermal pretreatment
Effect of acid concentration (% v/v)
	Reducing sugars (mg/g)		Inhibitors (mg/g)		Efficiency (RS/Inhibitor)
	Average	SD	Average	SD	Average	SD
Control	2.1662	0.2188	1.4642	0.0137	1.4794	0.1633
0	9.247	0.0927	2.3549	0.0080052	3.9268	0.0527
0.25	15.9973	0.187	2.7893	0.0138	5.7353	0.0955
0.5	27.503	2.1679	3.4333	0.0206	8.0107	0.6796
0.75	40.1845	1.7319	3.5907	0.0131	11.1914	0.5232
1	57.7232	0.4635	5.0599	0.1154	11.408	0.3518
2	80.5808	0.6841	6.7708	0.0455	11.9012	0.1809
3	100.938	0.1398	8.4959	0.1941	11.8808	0.2879
4	124.564	0.6672	10.1247	0.1342	12.3029	0.2289
5	135.641	1.3008	10.9149	0.1072	12.4271	0.2413
Effect of pretreatment temperature (deg C)
	Reducing sugars (mg/g)		Inhibitors (mg/g)		Efficiency (RS/Inhibitor)
	Average	SD	Average	SD	Average	SD
Control	2.5534	0.4328	1.6428	0.0081526	1.5543	0.2711
Room temp.	5.4264	0.094	2.4698	0.0063168	2.1971	0.0437
110	22.0967	0.6577	3.7572	0.0083564	5.8812	0.1881
120	30.7292	0.685	3.9796	0.0347	7.7216	0.2395
130	42.7581	1.007	4.1	0.0347	10.4288	0.334
140	73.4417	3.5505	4.2792	0.0551	17.1624	1.0508
150	103.613	2.3244	4.5804	0.0138	22.621	0.5755
160	150.101	2.0188	5.4711	0.011	27.4351	0.4239
170	167.613	3.3912	6.5152	0.0192	25.7265	0.5964
180	191.012	8.1765	8.2054	0.0723	23.2787	1.2016
190	200.453	2.2201	12.2674	0.0827	16.3402	0.2911
200	204.147	1.6291	20.4681	0.1206	9.9739	0.1384
Effect of pretreatment time (min)
	Reducing sugars (mg/g)		Inhibitors (mg/g)		Efficiency (RS/Inhibitor)
	Average	SD	Average	SD	Average	SD
Control	4.1257	0.5239	1.8741	0.0092441	2.2015	0.2904
0	7.2495	0.1776	2.53	0.027	2.8655	0.1008
15	27.0106	0.8419	3.7809	0.0939	7.1439	0.4002
30	130.35	2.6876	5.1992	0.1441	25.0712	1.2117
45	191.493	7.7488	10.6685	0.3265	17.9494	1.2757
60	205.603	5.3331	21.0814	0.5402	9.7528	0.5029
Effect of biomass concentration (g/L)
	Reducing sugars (mg/g)		Inhibitors (mg/g)		Efficiency (RS/Inhibitor)
	Average	SD	Average	SD	Average	SD
10	75.0487	0.5605	6.6653	0.0125	11.2597	0.1053
20	95.6412	1.1122	5.8877	0.1472	16.2443	0.5951
30	129.712	2.7179	4.8816	0.1565	26.5717	1.4084
40	151.784	1.5157	4.8891	0.1887	31.045	1.508
50	136.618	1.2126	4.6867	0.0665	29.1502	0.6722

## Sheet: H2 fr acid pretreated biomas
Vary substrate concentration
	25 g-VS/L			20 g-VS/L			15 g-VS/L			10 g-VS/L			5 g-VS/L
Hr	HP	SD	Hr	HP	SD	Hr	HP	SD	Hr	HP	SD	Hr	HP	SD
0	0	0	0	0	0	0	0	0	0	0	0	0	0	0
6	0	0	6	0	0	6	0	0	6	0	0	6	0	0
10	0	0	10	0	0	10	45.7416	9.51538	10	108.493	11.7772	10	63.2429	4.01782
19	24.9905	4.49896	19	37.1326	5.93088	19	141.336	35.2666	19	239.828	12.4706	19	134.243	11.8153
31	64.1844	17.2049	31	104.845	14.2364	31	230.39	46.2126	31	239.828	12.4706	31	134.243	11.8153
43	120.168	24.5278	43	170.237	14.855	43	272.155	28.0723
68	185.217	34.4994	92	221.692	22.1363	68	293.801	20.9559
92	221.951	37.9752	116	245.163	14.4907	92	293.801	20.9559
116	231.396	21.6254	140	245.163	14.4907
140	231.396	21.6254
Vary S/I ratio
	S/I 1		S/I 2		SI 3		SI 4		SI 5
Hr	HP	SD	HP	SD	HP	SD	HP	SD	HP	SD
0	0	0	0	0	0	0	0	0	0	0
12	54.1512	1.27224	76.081	5.96607	63.7431	2.46132	63.6529	5.42076	62.7586	4.30407
23	147.393	9.79376	240.403	11.3669	192.527	9.11631	177.863	14.7713	175.644	5.25836
36	222.923	10.3869	344.957	19.1036	285.576	10.7993	265.917	4.1507	271.759	18.8337
48	222.923	10.3869	344.957	19.1036	285.576	10.7993	265.917	4.1507	271.759	18.8337
Vary initial pH
	pH 4.0			pH 4.5			pH 5.0			pH 5.5			pH 6.0			pH 6.5			pH 7.0
Hr	HP	SD	Hr	HP	SD	Hr	HP	SD	Hr	HP	SD	Hr	HP	SD	Hr	HP	SD	Hr	HP	SD
0	0	0	0	0	0	0	0	0	0	0	0	0	0	0	0	0	0	0	0	0
18	11.1508	0.50487	12	32.6215	5.82651	12	76.63	23.0685	12	71.2063	17.0176	12	79.3717	10.1634	12	68.509	14.6938	12	55.948	5.19092
24	26.1261	1.94069	18	89.6047	8.37001	18	157.88	26.2821	18	191.2	38.3596	18	176.164	13.4452	18	157.197	18.3646	18	145.224	3.31484
37	26.1261	1.94069	24	134.435	6.08383	24	219.514	31.2323	24	293.101	27.1376	24	263.154	15.9814	24	239.768	12.1074	24	223.501	17.9229
			37	134.435	6.08383	37	219.514	31.2323	37	366.193	27.2918	37	337.575	16.4085	37	315.133	8.42201	37	286.503	22.4782
									51	393.814	22.2786	51	337.575	16.4085	51	315.133	8.42201	51	286.503	22.4782
									63	393.814	22.2786

## Sheet: H2 fr acid-thermal pretreated
Vary substrate concentration
5 g-VS/L			10 g-VS/L			15 g-VS/L			20 g-VS/L			25 g-VS/L			30 g-VS/L			35 g-VS/L
Hr	HP	SD	Hr	HP	SD	Hr	HP	SD	Hr	HP	SD	Hr	HP	SD	Hr	HP	SD	Hr	HP	SD
0	0	0	0	0	0	0	0	0	0	0	0	0	0	0	0	0	0	0	0	0
10	85.7463	1.22759	10	129.169	37.9088	10	173.092	52.0465	10	238.195	72.4216	10	173.55	34.0804	10	126.176	21.0508	10	148.148	60.523
16	188.219	1.61257	16	376.172	78.4303	16	511.633	40.3466	16	682.6	21.0491	16	685.543	75.364	16	713.417	10.9966	16	715.754	71.7599
22	188.219	1.61257	22	417.027	43.5884	22	656.371	45.0461	22	818.704	25.4107	22	843.999	72.5822	22	930.404	33.9746	22	1026.36	38.2474
			31	417.027	43.5884	31	782.815	43.2287	31	963.953	34.978	31	943.944	86.1062	31	1018.99	40.7077	31	1168.77	47.3973
						60	782.815	43.2287	60	1049.98	41.974	60	1091.21	74.1653	60	1111.17	56.0697	60	1270.74	46.2404
									84	1049.98	41.974	84	1128.37	11.7256	84	1232.01	52.1869	84	1405.53	33.7509
Vary S/I ratio
	S/I 1		S/I 2		SI 3		SI 4		SI 5
Hr	HP	SD	HP	SD	HP	SD	HP	SD	HP	SD
0	0	0	0	0	0	0	0	0	0	0
13	533.315	69.706	536.132	85.7557	470.854	33.8616	371.219	26.5042	355.842	76.2364
18	722.364	66.9655	737.55	65.7368	778.559	5.70613	602.458	8.28834	565.187	68.8458
28	883.665	44.5465	927.621	37.2561	942.399	24.5075	762.312	36.1445	711.886	82.2725
40	883.665	44.5465	927.621	37.2561	1053.44	33.9068	902.366	26.5846	877.797	18.8722
64	883.665	44.5465	927.621	37.2561	1053.44	33.9068	902.366	26.5846	877.797	18.8722
Vary initial pH
pH 4.0			pH 4.5			pH 5.0			pH 5.5			pH 6.0			pH 6.5			pH 7.0
Hr	HP	Hr	HP	SD	Hr	HP	SD	Hr	HP	SD	Hr	HP	SD	Hr	HP	SD	Hr	HP	SD
0	0	0	0	0	0	0	0	0	0	0	0	0	0	0	0	0	0	0	0
0	0	48	89.7885	43.7339	26	137.341	17.393	6	0	0	6	72.0032	5.35649	6	134.875	27.7351	6	285.315	47.4056
0	0	72	300.654	54.7695	33	378.78	47.1991	17	431.473	14.6166	17	728.443	58.2192	17	691.32	32.4769	17	693.299	8.2123
0	0	96	357.896	51.1287	48	744.742	6.59507	26	897.213	26.6833	26	952.48	73.4914	26	904.024	59.9581	26	871.831	37.0341
					72	877.72	13.2345	33	1046.97	26.0909	33	1079.2	81.3282	33	1042.15	91.3516	33	871.831	37.0341
					96	877.72	13.2345	48	1046.97	26.0909	48	1079.2	81.3282	48	1042.15	91.3516	48	871.831	37.0341
								64	1046.97	26.0909	64	1093.24	109.752	64	1042.15	91.3516	64	871.831	37.0341
