# Supplementary material for: Improvement of hydrogen production from Chlorella sp. biomass by acid-thermal pretreatment
Source: PeerJ. 2019 Mar 21;7:e6637. doi: 10.7717/peerj.6637 (PMC6431539; doi:10.7717/peerj.6637)
Supplement: Table S1 [file peerj-07-6637-s002.docx]

**Supplemental Table S1**

Estimated kinetic parameters by the use of the modified Gompertz model (Eq. (1)) and VFAs concentrations in the effluent of hydrogen production from acid-pretreated *Chlorella* sp. biomass.

| Conditions | *H*max  (mL/L) | HPR  (mL/L·h) | λ  (h) | HY  (mL/g-VS) | VFAs (g/L) | | | | |
| --- | --- | --- | --- | --- | --- | --- | --- | --- | --- |
| HAc | HBu | HPr | HFo | HLa |
| Biomass concentration (g-VS/L) | | | | | | | | | |
| 5 | 134 | 26.9 | 7.6 | 26.8 | 0.89 | 0.50 | 0.08 | nd | nd |
| 10 | 240 | 51.8 | 7.9 | 24.0 | 0.83 | 0.70 | 0.10 | nd | nd |
| 15 | 298 | 12.3 | 7.4 | 19.6 | 0.56 | 0.78 | 0.07 | nd | nd |
| 20 | 239 | 6.3 | 14.3 | 12.3 | 0.51 | 0.81 | nd | nd | 0.03 |
| 25 | 233 | 4.5 | 16.0 | 9.3 | 0.50 | 0.82 | nd | 0.16 | 0.20 |
| S/I ratio | | | | | | | | | |
| 1 | 229 | 9.5 | 6.6 | 14.9 | 0.70 | 0.85 | 0.14 | nd | nd |
| 2 | 358 | 17.1 | 7.8 | 23.0 | 0.72 | 0.82 | 0.04 | nd | nd |
| 3 | 299 | 13.5 | 7.6 | 19.0 | 0.48 | 0.47 | nd | nd | 0.08 |
| 4 | 283 | 12.2 | 7.1 | 17.7 | 0.47 | 0.48 | nd | 0.03 | 0.07 |
| 5 | 288 | 11.9 | 7.1 | 18.1 | 0.44 | 0.44 | nd | 0.19 | 0.79 |
| Initial pH | | | | | | | | | |
| 4.0 | 26 | 4.9 | 15.7 | 1.7 | 0.44 | 0.32 | nd | 0.09 | 0.03 |
| 4.5 | 139 | 11.7 | 9.4 | 9.0 | 0.51 | 0.42 | nd | nd | 0.08 |
| 5.0 | 227 | 17.6 | 7.8 | 14.6 | 0.55 | 0.55 | nd | nd | nd |
| 5.5 | 401 | 19.8 | 7.7 | 26.3 | 0.99 | 0.72 | nd | nd | nd |
| 6.0 | 346 | 17.9 | 7.8 | 22.5 | 1.25 | 0.79 | nd | 0.17 | nd |
| 6.5 | 323 | 16.5 | 8.2 | 21.0 | 1.84 | 0.85 | 0.27 | nd | nd |
| 7.0 | 292 | 16.4 | 8.9 | 19.1 | 1.55 | 0.89 | 0.34 | nd | nd |
| *H*max is maximum hydrogen production, HPR is maximum hydrogen production rate, λ is lag time, HY is hydrogen yield, calculated by dividing the actual maximum hydrogen productionby the VS, VFAs is volatile fatty acids, HAc is acetic acid, HBu is butyric acid, HPr is propionic acid, HFo is formic acid, HLa is lactic acid, nd = not detected | | | | | | | | | |
